# Supplementary material
Source: publisher figshare collection journal article supplement (https://karger.figshare.com/ndownloader/files/12793937)
Supplement: Supplementary file 1 [file 12793937]

## SUPPLEMENTARY MATERIAL

# **Anti-Cancer Effects of Radix Angelica Sinensis (Danggui) and N-Butylidenephthalide on Gastric Cancer: Implications For REDD1 Activation and Mtor Inhibition**

Kuan-Fu Liao<sup>a,b</sup> Tsung-Lang Chiu<sup>c,d</sup> Sung-Ying Huang<sup>e</sup> Teng-Fu Hsieh<sup>c,f</sup>  
Shu-Fang Chang<sup>g</sup> Jhen-Wei Ruan<sup>h</sup> Shee-Ping Chen<sup>i</sup> Cheng-Yoong Pang<sup>j,k</sup>  
Sheng-Chun Chiu<sup>g,l,m</sup>

<sup>a</sup>Graduate Institute of Integrated Medicine, China Medical University, Taichung, <sup>b</sup>Department of Internal Medicine, Taichung Tzu Chi Hospital, Buddhist Tzu Chi Medical Foundation, Taichung, <sup>c</sup>School of Medicine, Tzu Chi University, Hualien, <sup>d</sup>Division of Neuro-Oncology, Neuro-Medical Scientific Center, Hualien Tzu Chi Hospital, Buddhist Tzu Chi Medical Foundation, Hualien, <sup>e</sup>Department of Ophthalmology, Hsinchu Mackay Memorial Hospital, Hsinchu, <sup>f</sup>Department of Urology, Taichung Tzu Chi Hospital, Buddhist Tzu Chi Medical Foundation, Taichung, <sup>g</sup>Department of Research, Taichung Tzu Chi Hospital, Buddhist Tzu Chi Medical Foundation, Taichung, <sup>h</sup>Immunology Research Center, National Health Research Institutes, Miaoli, <sup>i</sup>Tzu Chi Stem Cells Center, Hualien Tzu Chi Hospital, Buddhist Tzu Chi Medical Foundation, Hualien, <sup>j</sup>Department of Medical Research, Hualien Tzu Chi Hospital, Buddhist Tzu Chi Medical Foundation, Hualien, <sup>k</sup>Institute of Medical Sciences, School of Medicine, Tzu Chi University, Hualien, <sup>l</sup>Department of Laboratory Medicine, Taichung Tzu Chi Hospital, Buddhist Tzu Chi Medical Foundation, Taichung, <sup>m</sup>General Education Center, Tzu Chi University of Science and Technology, Hualien, Taiwan

Table S1. Baseline characteristics.

| Characteristics             | Exposure      | No exposure   | p-value |
|-----------------------------|---------------|---------------|---------|
| Patient no.                 | 557           | 2228          |         |
| Mean age, years ( $\pm$ SD) | 60 $\pm$ 13   | 60 $\pm$ 13   | NA      |
| Gender                      |               |               | NA      |
| Male                        | 301(54.0)     | 1204(54.0)    |         |
| Female                      | 256(46.0)     | 1024(46.0)    |         |
| CCIS( $\pm$ SD)             | 1.5 $\pm$ 2.3 | 1.5 $\pm$ 2.3 | NA      |
| Socioeconomic status        |               |               | 0.325   |
| Low SES                     | 177(31.8)     | 757(34.0)     |         |
| Moderate and high SES       | 380(68.2)     | 1471(66.0)    |         |
| Urbanization                |               |               | <0.001  |
| Urban                       | 133(23.9)     | 695(31.2)     |         |
| Un-urban                    | 424(76.1)     | 1533(68.8)    |         |
| Geographic region           |               |               | 0.244   |
| Northern/Central            | 371(66.6)     | 1541(69.2)    |         |
| Southern/Eastern            | 186(33.4)     | 687(30.8)     |         |

Abbreviation: SES, socioeconomic status.

**Fig. S1.**

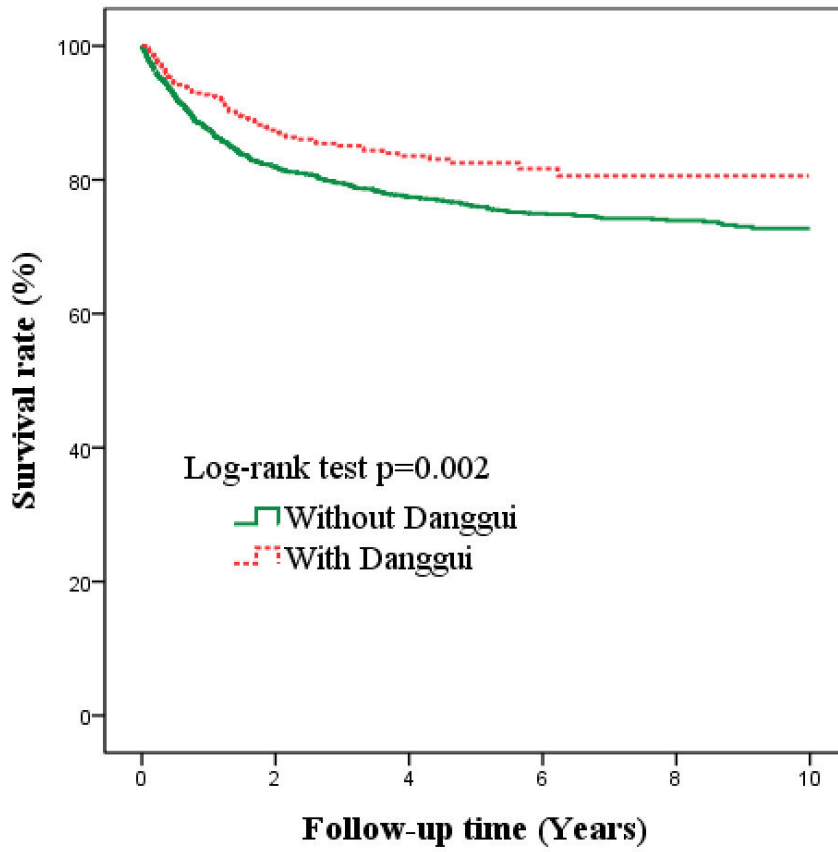

**Fig. S1.** The effect of *danggui* on the survival rate of Taiwan gastric cancer patients. A total of 32,279 gastric cancer patients were included in this study cohort. These patients accrued follow-up time for 11 years. Crude overall Kaplan-Meier survival curves for the gastric cancer patients was investigated. (log-rank:  $p = 0.002$ )

Fig. S2

A

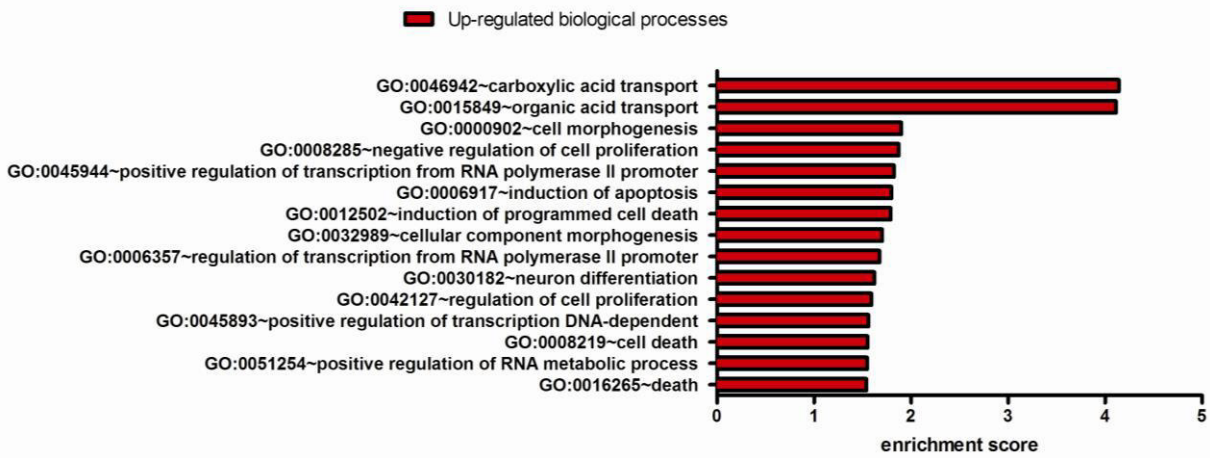

B

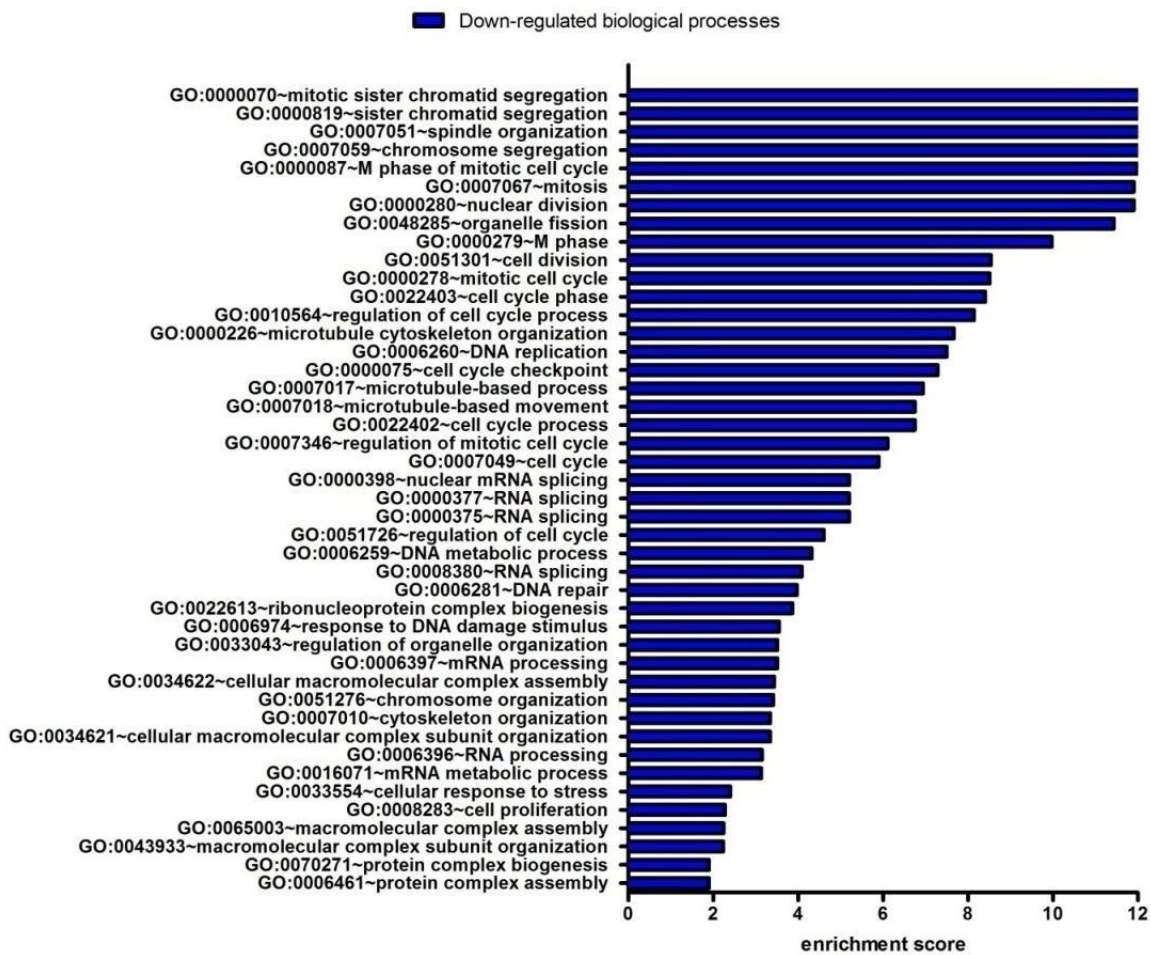

Fig. S2. Analysis of BP regulated gene expression in AGS cells. [A] Gene ontology biological processes that were significantly over-represented among up-regulated and down-regulated [B] genes in the comparison of BP-treated AGS cell to the control group.

**Fig. S3.**

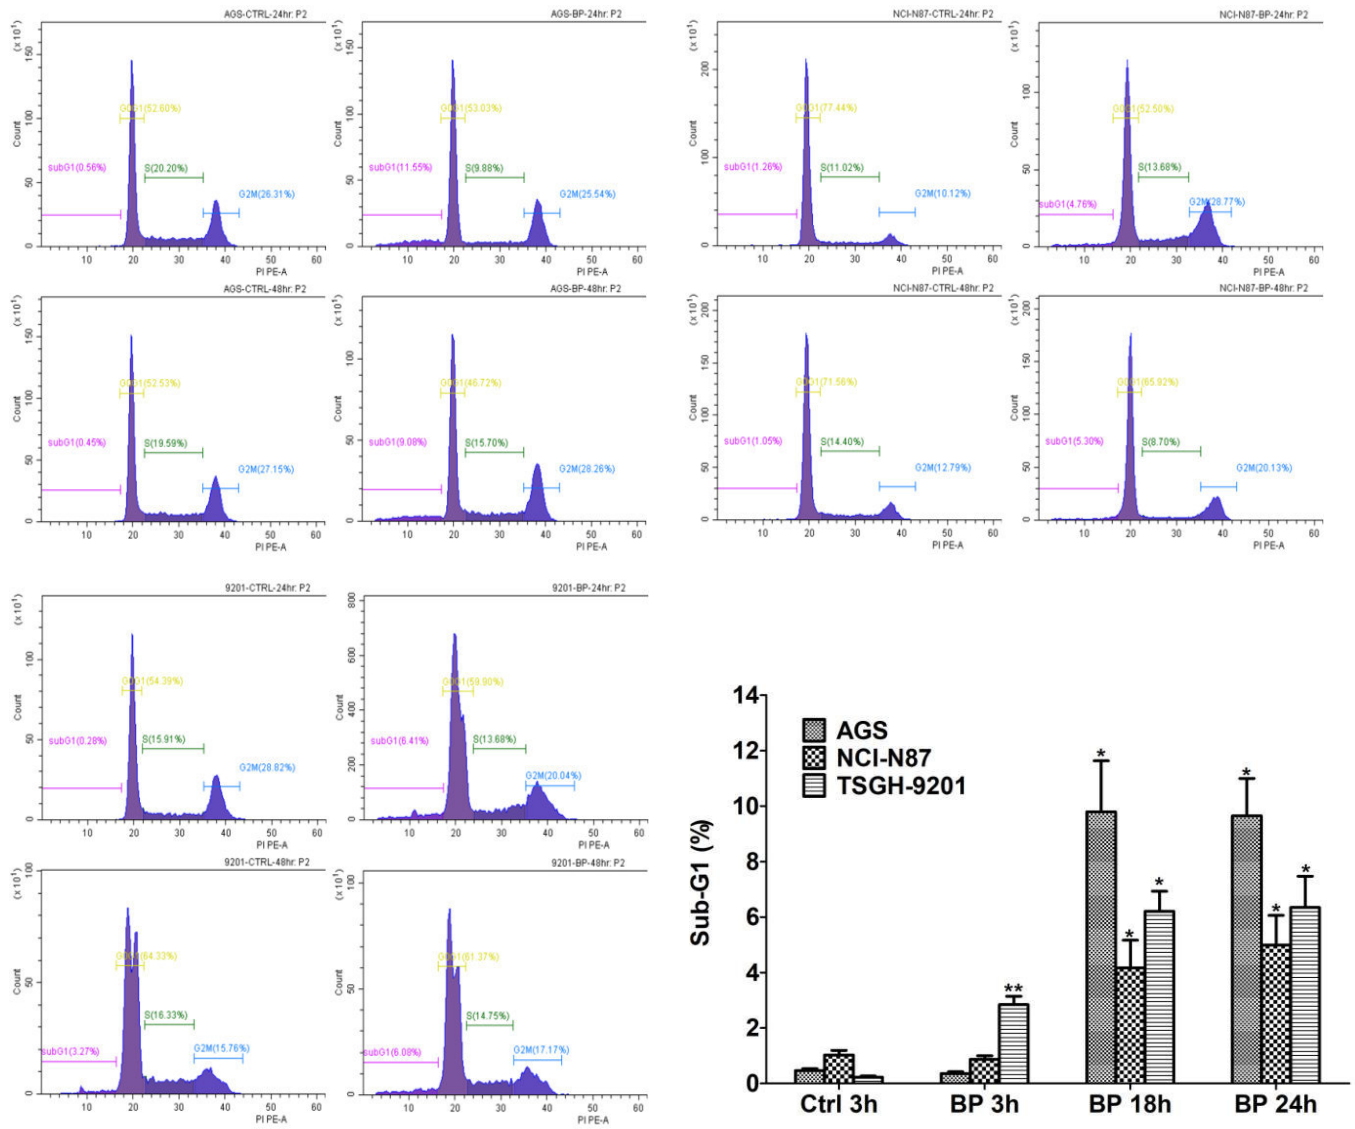

**Fig. S3.** Flow cytometric analysis of gastric cancer cells treated with BP-Sub G1. The accumulation of sub-G1 cell population in the presence or absence of 50 (AGS) or 75 (NCI-N87 and TSGH-9201)  $\mu$ g/ml BP for 24 and 48 h. The percentage of sub-G1 population in gastric cancer cells is shown.
